# Supplementary material
Source: publisher figshare collection journal article supplement (https://rs.figshare.com/ndownloader/files/14570084)
Supplement: Supplementary file 1 [file 14570084]

# Supplementary material

## Dynamics and stability of running on rough terrains

Nihav Dhawale<sup>1,2</sup>, Shreyas Mandre<sup>3</sup>, and Madhusudhan Venkadesan<sup>\*1</sup>

<sup>1</sup>Department of Mechanical Engineering and Materials Science, Yale University, New Haven, CT 06520

<sup>2</sup>National Centre for Biological Sciences–Tata Institute of Fundamental Research, Bangalore, Karnataka 560065

<sup>3</sup>School of Engineering, Brown University, Providence, RI 02912

### Contents

|            |                                                                                                       |            |
|------------|-------------------------------------------------------------------------------------------------------|------------|
| <b>S1</b>  | <b>Methods</b>                                                                                        | <b>S2</b>  |
| S1.1       | Simulation methods . . . . .                                                                          | S2         |
| S1.2       | Parameter values for a human-like runner . . . . .                                                    | S2         |
| S1.3       | Terrain model . . . . .                                                                               | S2         |
| S1.4       | Calculating ground contact point . . . . .                                                            | S2         |
| <b>S2</b>  | <b>Convergence of the Monte Carlo simulations</b>                                                     | <b>S3</b>  |
| <b>S3</b>  | <b>Model Details</b>                                                                                  | <b>S3</b>  |
| S3.1       | Passive collision . . . . .                                                                           | S3         |
| S3.2       | Relationship between $\epsilon_t$ and $\epsilon_{tc}$ . . . . .                                       | S4         |
| S3.3       | Open-loop push-off strategies . . . . .                                                               | S6         |
| <b>S4</b>  | <b>Open-loop runners on rough terrain</b>                                                             | <b>S6</b>  |
| S4.1       | The open-loop passive collision . . . . .                                                             | S6         |
| S4.2       | Additive noise in open-loop strategies . . . . .                                                      | S7         |
| <b>S5</b>  | <b>Anticipatory runners on rough terrain</b>                                                          | <b>S8</b>  |
| S5.1       | Forward collision parameter $\hat{\epsilon}_t$ as a function of $\epsilon_{tc}$ . . . . .             | S9         |
| <b>S6</b>  | <b>Linear stability analysis: Jordan decomposition of <math>T_{ol}</math> and <math>T_{an}</math></b> | <b>S9</b>  |
| <b>S7</b>  | <b>Scaling analysis of orientational failures</b>                                                     | <b>S12</b> |
| <b>S8</b>  | <b>Steps to failure statistics</b>                                                                    | <b>S13</b> |
| <b>S9</b>  | <b>Effect of changing runner size relative to terrain grid spacing</b>                                | <b>S16</b> |
| <b>S10</b> | <b>Monte Carlo simulations with a <i>lab-fixed</i> push-off policy</b>                                | <b>S17</b> |
| S10.1      | Open-loop runners . . . . .                                                                           | S17        |
| S10.2      | Anticipatory runners . . . . .                                                                        | S18        |
| S10.3      | Scaling analysis of mean steps taken . . . . .                                                        | S19        |

---

\*Address correspondence to [mv@classicalmechanic.net](mailto:mv@classicalmechanic.net)

## S1 Methods

### S1.1 Simulation methods

All simulations were performed using custom-written C programs. Parameter values given in table 1 are used for simulations of the human-like runner. These values are chosen for the purpose of illustration, however our qualitative results are not sensitive to these values, and the scaling analysis in section 5 of the main text addresses the generalization of these numerical results to runners and terrains with varying parameter values.

### S1.2 Parameter values for a human-like runner

The rationale for choosing the human-like parameter values is as follows. The moment of inertia value we use is derived from estimates made by Erdmann (1999), who find that moment of inertia about the center of mass in the sagittal plane is  $\approx 13 \text{ kg.m}^2$  for a 75 kg human. The value for  $\epsilon_n = 0.63$  corresponds to  $\approx 40\%$  elastic energy stored over one gait cycle, similar to estimates by (Cavagna et al., 1964; Cavagna and Kaneko, 1977; Alexander et al., 1987). The orientation bound  $\phi_{\text{tol}}$  is equal to  $\pi/6$  as it is approximately half the angle between the legs during double stance in walking. Forward speed at take-off  $v_{x0} = 0.96$  corresponds to 3 m/s for a leg length of 1 m and vertical speed at take-off  $v_{y0} = 0.26$  corresponds to  $\approx 0.8 \text{ m/s}$  (Dhawale and Venkadesan, 2018). Distributions had nearly converged by an ensemble size of  $10^4$ , hence we simulate for  $10^5$  instances (section S2).

### S1.3 Terrain model

The terrain is modelled as piecewise linear. This is achieved by first defining a one-dimensional grid with fixed grid spacing  $\lambda$ . Interpolating heights between the grid points  $k$ , located at  $x_k$  to intermediate points  $(x_t, y_t)$  in the  $k$ th terrain patch, yields a piecewise linear, continuous terrain profile, where terrain slope  $m_k$  is discontinuous at the grid points,

$$\text{patch } k : y_t = m_k x_t + c_k, \quad (\text{S1a})$$

$$\text{where } x_t \in [x_k, x_{k+1}], \quad (\text{S1b})$$

$$\text{continuity condition: } m_k x_{k+1} + c_k = m_{k+1} x_{k+1} + c_{k+1}, \quad (\text{S1c})$$

where  $m_k$  and  $c_k$  are constants within a patch. Terrain heights at all grid points are distributed according to  $\sim \mathcal{U}(-0.03, 0.03)$  (table 1). Our choice of the uniform distribution  $\mathcal{U}$  is to improve simulation speed, even though beta distributions described in Fig. 2e most closely matched artificial terrain used in experiments (Dhawale et al., 2015; Dhawale and Venkadesan, 2018). The range of heights  $h \in [-0.03, 0.03]$  and grid spacing  $\lambda = 0.1$  was chosen to match the artificially constructed rough terrains (Dhawale et al., 2015; Dhawale and Venkadesan, 2018).

Step-like terrains with no slope distributions were simulated by picking a height from the probability distribution prior to landing. If the chosen landing height was above the apex height of any portion of the runner, we chose another landing height from the distribution. The probability of this resampling occurring is  $\sim 10^{-4}$ .

### S1.4 Calculating ground contact point

The aerial phase ends when the runner collides with the ground. The landing position is determined by solving for the unknown intersection point  $x_t$  of the runner's aerial phase trajectory  $(x_G, y_G)$

with the condition for tangential contact between runner and ground,

$$\text{parabolic flight: } y_G = b_0 + b_1 x_G + b_2 x_G^2, \quad (\text{S2a})$$

$$\text{touchdown: } y_G = y_t + \frac{1}{\sqrt{1 + m_k^2}}, \quad x_G = x_t - \frac{m_k}{\sqrt{1 + m_k^2}}, \quad (\text{S2b})$$

where  $b_0, b_1, b_2$  are constants that define the aerial phase trajectory. Equations (S1)-(S2) solved simultaneously yield a quadratic equation in  $x_t$ ,

$$Ax_t^2 + Bx_t + C = 0, \quad (\text{S3a})$$

$$\text{where } A = b_2, \quad (\text{S3b})$$

$$B = b_1 - 2b_2 \frac{m_k}{\sqrt{1 + m_k^2}} - m_k, \quad (\text{S3c})$$

$$C = b_0 - \frac{b_1 m_k - 1}{\sqrt{1 + m_k^2}} + b_2 \frac{m_k^2}{1 + m_k^2} - c_k. \quad (\text{S3d})$$

The larger of the two roots of this quadratic is the true landing point  $x_P$ , if the roots are real and the larger of the two roots is greater than  $x_k$ . The other real root is always less than  $x_k$  and corresponds to the intersection of the aerial phase trajectory with the terrain patch closer to the take-off point. On flat terrain, the smaller root is the location of the take-off point. Having solved for  $x_P$ , the position of the center of mass at landing is determined using equation (S2b).

However, if the runner lands on a grid point, the position of the center of mass appears to be indeterminate as the grid point  $x_k$  is associated with two slopes,  $m_k$  and  $m_{k+1}$ . In fact, we detect a corner collision if the larger root of equation (S3a) is less than  $x_k$ , or if the roots are complex. Thus, we now know the position of contact point P,  $x_P = x_k$ , but cannot determine  $(x_G, y_G)$  at contact using equation (S2b), since  $x_k$  is associated with slopes  $m_k$  and  $m_{k+1}$ . We determine a unique slope at the point  $x_k$  by accounting for the aerial phase trajectory. Substituting  $x_t = x_k$  in equation (S3a), we write equations (S3) as a quartic polynomial in unknown  $m_k$ . We numerically find all the roots using the Jenkins-Traub algorithm (Jenkins and Traub, 1970) and pick the real root that corresponds to first contact between the ground and runner, i.e. when the parabolic trajectory describing the aerial phase is above the ground.

## S2 Convergence of the Monte Carlo simulations

We ran Monte Carlo simulations with different ensemble sizes to test for convergence of the steps to failure distributions. We define the criterion for convergence as the first three moments of the distribution remaining unchanged to one significant decimal place as a function of ensemble size. This criteria is met with an ensemble size of  $10^4$  (Fig. S1). Hence we perform Monte Carlo simulations in the main text with an ensemble size of at least  $10^5$ .

## S3 Model Details

### S3.1 Passive collision

A runner with center of mass velocity  $\mathbf{v}_G^-$  and angular velocity  $\omega^-$ , collides with a terrain patch angled at  $\theta$  with respect to the horizontal. By simultaneously solving equations describing the collision at the contact point P (main text equation (1a)), and using kinematic constraints associated

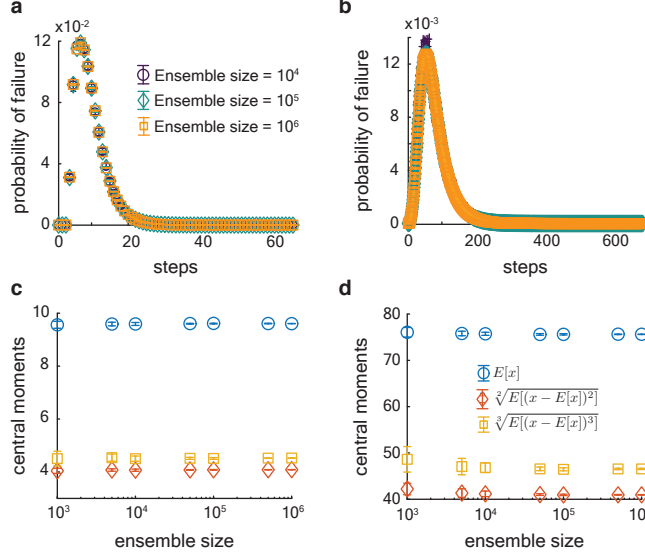

Figure S1: Monte Carlo simulations of open-loop and anticipatory runners with human-like parameter values and varying ensemble sizes. Ten simulations for each ensemble size were performed. Open markers represent the mean value, with error bars showing the standard deviation over the 10 runs. Steps to failure distributions for the **a**, open-loop runner and **b**, anticipatory runner. The y-axis of the plots is the joint probability  $p(\text{falling at step number } i, \text{reaching step number } i)$ . The first three central moments as a function of ensemble size for the **c**, open-loop runner and **d**, anticipatory runner are stationary for ensemble sizes greater than  $10^4$ .

with a rigid body, the linear velocity  $\mathbf{v}_G^c$  and angular velocity  $\omega^c$  of the runner after the collision are computed as,

$$\text{collision law: } v_{P,t}^c = \epsilon_t v_{P,t}^-, \quad (\text{S4a})$$

$$v_{P,n}^c = -\epsilon_n v_{P,n}^-, \quad (\text{S4b})$$

$$H_P^c - H_P^- = 0, \quad (\text{S4c})$$

$$\text{kinematic constraint: } \mathbf{v}_G = \mathbf{v}_P - \omega \begin{pmatrix} \cos \theta \\ -\sin \theta \end{pmatrix}, \quad (\text{S4d})$$

$$\Rightarrow \mathbf{v}_G^c = \begin{pmatrix} \frac{(v_{G,x}^- \cos 2\theta + v_{G,y}^- \sin 2\theta)A + v_{G,x}^- B + C\omega^- \cos \theta}{2(I_G + 1)} \\ \frac{(v_{G,x}^- \sin 2\theta - v_{G,y}^- \cos 2\theta)A + v_{G,y}^- B + C\omega^- \sin \theta}{2(I_G + 1)} \end{pmatrix}, \quad (\text{S4e})$$

$$\text{and } \omega^c = \frac{(\epsilon_t + I_G)\omega^- - (1 - \epsilon_t)v_{G,t}^-}{1 + I_G}, \quad (\text{S4f})$$

$$\text{where } A = I_G(\epsilon_t + \epsilon_n) + \epsilon_n + 1, \quad B = \epsilon_t I_G - (I_G + 1)\epsilon_n + 1, \quad C = 2(\epsilon_t - 1)I_G, \quad (\text{S4g})$$

$$\text{and } v_{G,t} = v_{G,x} \cos \theta + v_{G,y} \sin \theta. \quad (\text{S4h})$$

### S3.2 Relationship between $\epsilon_t$ and $\epsilon_{tc}$

Based on a detailed consideration of how an animal may use its foot speed to control the tangential collision, we arrive at equation (2) in the main text. The velocity of the foot and center of mass are not constrained to be the same for a running animal. For example, the animal may retract the leg to

vary the foot's speed independent of the center of mass speed. We make the simplifying assumption that the foot comes to rest, or nearly so, upon colliding with the ground. In an animal, there is an additional degree of control corresponding to modulating the transmission of the collision between the foot and center of mass through changes in the leg posture and muscle co-contraction. We do not include this additional mode of controlling collisions in our consideration.

The use of the foot enables the runner to reduce the effective collision independent of the body's overall linear and angular momentum. Thus the tangential coefficient of restitution  $\epsilon_t$  parametrizes the loss of speed of the foot relative to a point on a rigid runner that does not have the ability to modulate its foot speed. The foot speed of such a rigid runner is that of the contact point P in the rigid running model (Fig. 1b), one that translates with the center of mass and is also affected by any spin that the body may have. The tangential coefficient of restitution  $\epsilon_t$  at the moment of collision is therefore given by,

$$\epsilon_t = \frac{v_{P,t}^- - v_{\text{foot},t}^-}{v_{P,t}^-}. \quad (\text{S5})$$

These velocities are in a reference frame that is parallel to the tangential and normal directions of the terrain at the point of contact ( $\hat{t} - \hat{n}$  frame in Fig. S2). Point P refers to the contact point in the rigid runner that is coincident with the foot at the time of contact, but whose speed is solely a function of the body's linear and angular momentum.

When the foot speed exactly matches ground speed as seen from the body-fixed frame,  $\epsilon_t = 1$  and the tangential collision impulse would be zero. To an external observer, the foot's velocity vector would be exactly normal to the terrain at the point of contact and  $v_{\text{foot},t}^- = 0$ . If the foot's speed equals that of point P of the rigid runner, then  $\epsilon_t = 0$  and the runner experiences a significant tangential collision impulse.

The open-loop and anticipatory strategies differ in how they specify the foot speed. The intended coefficient of restitution  $\epsilon_{tc}$  for the open-loop strategy is specified under the assumption that the tangential speed of the contact point P equals the initial forward speed,  $v_{P,t}^- = v_{x0}$ . Furthermore, the open-loop strategy is only aware of the foot speed in a body-fixed frame, and its components relative to gravity, i.e. the components of  $\mathbf{v}_P^- - \mathbf{v}_{\text{foot}}^-$  in the x-y frame. These capture the three assumptions outlined in the main text (section 2.2). The intended coefficient  $\epsilon_{tc}$  for the anticipatory strategy makes no such assumption and simply follows equation S5. The respective equations for the anticipatory and open-loop  $\epsilon_{tc}$  are,

$$\epsilon_{tc} = \begin{cases} \frac{v_{P,x}^- - v_{\text{foot},x}^-}{v_{x0}} & : \text{open-loop,} \\ \frac{v_{P,t}^- - v_{\text{foot},t}^-}{v_{P,t}^-} & : \text{anticipatory.} \end{cases} \quad (\text{S6})$$

By combining equation (S5) and equation (S6) we find

$$\epsilon_t = \begin{cases} \epsilon_{tc} \left( \frac{v_{P,t}^- - v_{\text{foot},t}^-}{v_{P,x}^- - v_{\text{foot},x}^-} \right) \left( \frac{v_{x0}}{v_{P,t}^-} \right) & : \text{open-loop,} \\ \epsilon_{tc} & : \text{anticipatory.} \end{cases} \quad (\text{S7})$$

For small terrain angles  $\theta$ , the tangential and horizontal components of the foot speed relative to that of point P are nearly equal, i.e.  $(\mathbf{v}_P^- - \mathbf{v}_{\text{foot}}^-) \cdot \hat{t} \approx (\mathbf{v}_P^- - \mathbf{v}_{\text{foot}}^-) \cdot \hat{x}$ . Therefore, the main reason for  $\epsilon_{tc}$  to differ from  $\epsilon_t$  for the open-loop runner is because of the ratio of speed of the contact point  $\|\mathbf{v}_P^-\|$  versus the assumed forward speed  $v_{x0}$ . The open-loop relationship thus becomes  $\epsilon_t = \epsilon_{tc} v_{x0} / v_{P,t}^-$ , yielding equation (2) used in the main text.

### S3.3 Open-loop push-off strategies

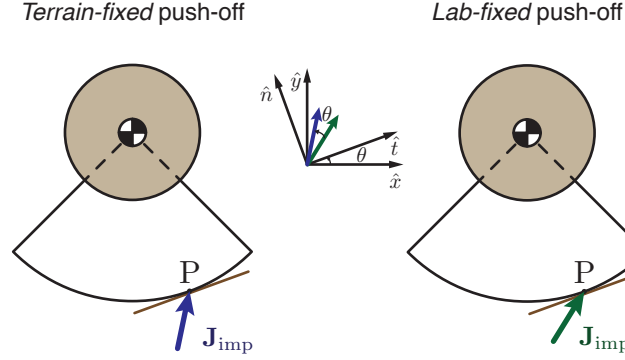

Figure S2: The *terrain-fixed* push-off impulse is the *lab-fixed* push-off impulse rotated by the terrain slope angle  $\theta$  about the contact point.

After the passive collision, the push-off impulse  $\mathbf{J}_{\text{imp}}$  is applied at the contact point P to propel the runner into the flight phase. Recall that  $J_\phi = 0$  for the open-loop push policies that we consider (main text equation (1c)). The push-off impulse  $\mathbf{J}_{\text{imp}}$  leads to discrete changes in the linear velocity of the center of mass  $\mathbf{v}_{\text{imp}}$ , and angular velocity of the runner  $\omega_{\text{imp}}$ . As discussed in main text section 2.3, a *terrain-fixed* push-off policy or a *lab-fixed* push-off policy both satisfy the periodicity criteria on flat ground, namely  $\mathbf{v}_{\text{G,steady}}^+ = (v_{x0}, v_{y0})^T$  and  $\omega^+ = 0$ , but differ in their behavior on rough terrain. The linear velocity  $\mathbf{v}_{\text{G}}^+$  and angular velocity  $\omega^+$  at take-off under these push-off policies are,

$$\mathbf{v}_{\text{G}}^+ = \mathbf{v}_{\text{G}}^c + \mathbf{v}_{\text{imp}}, \quad \omega^+ = \omega^c + \omega_{\text{imp}}, \quad (\text{S8a})$$

$$\text{where } \mathbf{v}_{\text{imp}} = \begin{cases} \mathbf{R} \begin{pmatrix} \frac{I_{\text{G}}(1-\epsilon_t)v_{x0}}{I_{\text{G}}+1} \\ (1-\epsilon_n)v_{y0} \end{pmatrix} & : \text{terrain-fixed}, \\ \begin{pmatrix} \frac{I_{\text{G}}(1-\epsilon_t)v_{x0}}{I_{\text{G}}+1} \\ (1-\epsilon_n)v_{y0} \end{pmatrix} & : \text{lab-fixed}, \end{cases} \quad (\text{S8b})$$

$$\omega_{\text{imp}} = \begin{cases} \frac{(1-\epsilon_t)v_{x0}}{I_{\text{G}}+1} & : \text{terrain-fixed}, \\ \frac{(1-\epsilon_t)v_{x0} \cos \theta}{I_{\text{G}}+1} + \frac{(1-\epsilon_n)v_{y0} \sin \theta}{I_{\text{G}}} & : \text{lab-fixed}, \end{cases}, \quad (\text{S8c})$$

$$\text{and } \mathbf{R} = \begin{pmatrix} \cos \theta & -\sin \theta \\ \sin \theta & \cos \theta \end{pmatrix}. \quad (\text{S8d})$$

## S4 Open-loop runners on rough terrain

### S4.1 The open-loop passive collision

The tangential collision parameter  $\epsilon_t$  for open-loop runners varies from step-to-step on rough terrains (main text equation (2)) and is thus characterized by distributions (Fig. S3a) that evolve according to running dynamics described in main text equation (1). These distributions achieve stationarity as seen in the representative case of the  $\epsilon_t$  distribution with  $\epsilon_{\text{tc}} = 0.4$ , that appears to converge by 5 steps (Fig. S3a). Mean  $\epsilon_t$  converges by 3 steps to values that are just a little larger than the corresponding  $\epsilon_{\text{tc}}$  values (Fig. S3c), and show a linear dependence on  $\epsilon_{\text{tc}}$  (Fig. S3b). The

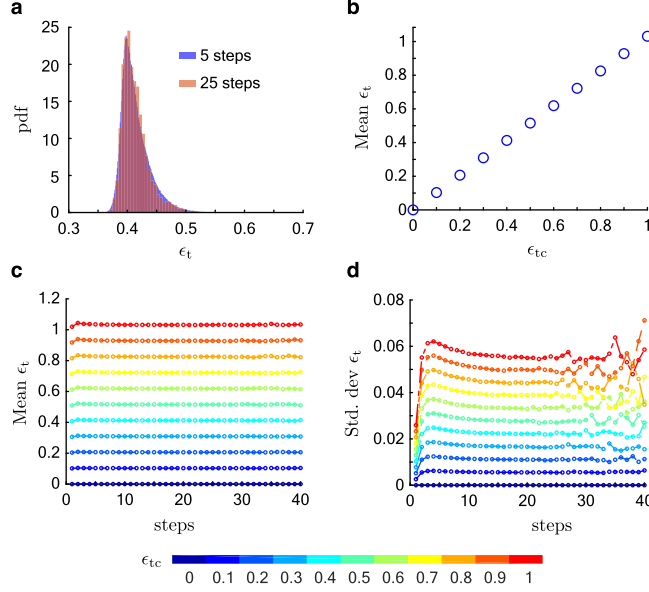

Figure S3: Monte Carlo simulations with  $10^6$  runners of tangential collisions in the open-loop strategy with human-like parameters on rough terrain. **a**, The probability density function of  $\epsilon_t$  after 5 steps and 25 steps for  $\epsilon_{tc} = 0.4$ . **b**, Steady-state mean  $\epsilon_t$  increases linearly with  $\epsilon_{tc}$ . **c**, Mean  $\epsilon_t$  as a function of step number for different values of  $\epsilon_{tc}$  (shown in the color bar below) converges by approximately 3 steps. **d**, Standard deviation of  $\epsilon_t$  as a function of step number for different values of  $\epsilon_{tc}$  also reaches a steady-state. However, the rate of convergence is slower at higher values of  $\epsilon_{tc}$ . The fluctuations at higher step number ( $\gtrsim 25$ ) are because we are probing the tails of the steps to failure distributions.

shape of the distribution is affected by the  $\epsilon_{tc}$  value as the standard deviation of the converged  $\epsilon_t$  distribution increases with  $\epsilon_{tc}$  (Fig. S3d).

The stability benefits of higher mean  $\epsilon_t$  values (Fig. S3b) are counteracted by corresponding higher fluctuations in  $\epsilon_t$  (Fig. S3d), leading to larger step-to-step fluctuations in body angular momentum. Hence for open-loop runners, mean steps to failure shows a weak dependence on  $\epsilon_{tc}$  value. In main text section 5, we arrive at this same conclusion via an asymptotic analysis of the series expansion of the orientation change over a single step caused by an unexpected terrain slope perturbation.

## S4.2 Additive noise in open-loop strategies

Additive noise in the tangential collision (main text section 3.5) of open-loop runners has little effect on mean steps to failure (Fig. S4) compared to the same noise intensity applied to anticipatory runners (main text Fig. 3b). For open-loop runners with human-like parameters, there is no optimal value of  $\epsilon_{tc}$  (Fig. S4) unlike the case with anticipatory runners where slight tangential collisions are optimal (main text Fig. 3b). The relative insensitivity of failure statistics to added noise for the open-loop runner is possibly because  $\epsilon_t$  varies significantly on rough terrains even in the absence of added noise (Fig. S3).

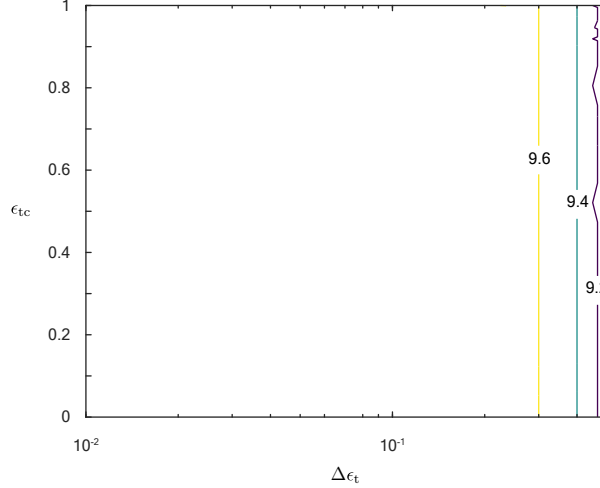

Figure S4: Effect of additive noise in  $\epsilon_{tc}$  for open-loop runners with human-like parameters. Contour plot of mean steps to failure as a function of  $\epsilon_{tc}$  and  $\Delta\epsilon_t$ . The mean steps to failure is constant as a function of  $\epsilon_{tc}$  and  $\Delta\epsilon_t$  below  $\Delta\epsilon_t = 0.2$ , and shows a small decrease with increasing  $\Delta\epsilon_t$  when  $\Delta\epsilon_t > 0.2$ . However, contours remain nearly parallel to the  $\epsilon_{tc}$  axis.

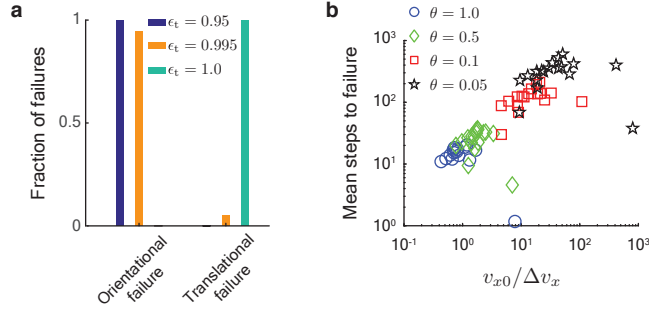

Figure S5: Anticipatory runners on rough terrain. **a**, Relative frequency of failure modes for anticipatory runners with  $\epsilon_n = 0$  on rough terrain. The orientation failure bound  $\phi_{tol} = \pi/6$  in these simulations and other parameters are the same as those for the human-like runner (main text table 1) **b**, Mean steps to failure as function of  $v_{x0}/\Delta v_x$  for the same range of parameters shown in Fig. S7, except that  $\epsilon_{tc} = 1$  here.

## S5 Anticipatory runners on rough terrain

In main text section 3.4 we describe how zeroing the tangential collision impulse stabilizes orientation, but deviations from this strategy quickly leads to a loss in stability. To underscore how quickly failure modes change, consider that anticipatory runners with  $\epsilon_{tc} = 1$  fail exclusively due to translational instabilities while anticipatory runners with human-like parameters and  $\epsilon_{tc} = 0.95$  fail exclusively due to orientational instabilities (Fig. S5a). Thus, the predominant failure mode switches quickly from translational failures to orientation failures close to  $\epsilon_{tc} = 1$ ; even runners with  $\epsilon_{tc} = 0.995$  predominantly undergoing orientational failures (Fig. S5a).

The mean steps to failure for an anticipatory runner with  $\epsilon_{tc} = 1$  is captured by a single parameter  $v_{x0}/\Delta v_x$  (Fig. S5b). The logic is similar to that in main text section 5 where the scaling analysis is for orientational failures, while here the failure mode is due to losing translational



stability (main text Fig. 1c). For a runner landing on sloped ground with forward speed  $v_{G,x}^- = v_{x0}$ , the loss in forward speed due to the terrain perturbation is  $\Delta v_x = v_{x0} - v_{G,x}^+$  over a single step. Following the logic outlined in main text section 5, the mean steps to failure  $N$  should scale as,

$$N \sim v_{x0}/\Delta v_x, \quad (\text{S9a})$$

$$\text{where } \Delta v_x = \sin \theta (v_{y0}(\cos \theta - 1 + \epsilon_n(\cos \theta + 1)) + v_{x0} \sin \theta (1 + \epsilon_n)). \quad (\text{S9b})$$

$$\text{Power series: } \Delta v_x = 2\epsilon_n v_{y0} \theta + v_{x0}(1 + \epsilon_n)\theta^2 + O(\theta^3). \quad (\text{S9c})$$

Equation (S9c) is the power series expansion for  $\Delta v_x$  about  $\theta = 0$  to second order in  $\theta$ . The power series analysis suggests that shallower flight trajectories (reducing  $v_{y0}$ ) and increasing energy dissipation (reducing  $\epsilon_n$ ) increases the mean steps to translational failure. The implications of shallower flight trajectories have been discussed in the discussion section of the main text. Results from the Monte Carlo simulations in main text Fig. 3a find that reducing  $\epsilon_n$  increases mean steps taken for anticipatory runners with  $\epsilon_{tc} = 1$ , consistent with equations (S9b)-(S9c).

### S5.1 Forward collision parameter $\hat{\epsilon}_t$ as a function of $\epsilon_{tc}$

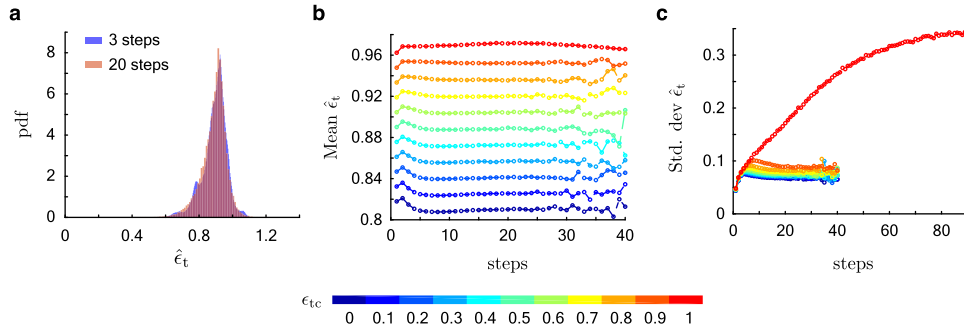

Figure S6: Evolution of forward collision parameter  $\hat{\epsilon}_t$  as a function of step number and  $\epsilon_{tc}$ . **a**, The probability density function of  $\hat{\epsilon}_t$  after 3 steps and 20 steps for  $\epsilon_{tc} = 0.5$ . **b**, Mean  $\hat{\epsilon}_t$  as a function of step number for different values of  $\epsilon_{tc}$  (shown in the color bar below). The mean converges by approximately 5 steps for all values of  $\epsilon_{tc}$ . **c**, Standard deviation of  $\hat{\epsilon}_t$  as a function of step number for different values of  $\epsilon_{tc}$ . While the standard deviation converges by 15 steps for values of  $\epsilon_{tc} < 1$ , for  $\epsilon_{tc} = 1$  it increases monotonically, plateauing after approximately 80 steps.

The forward collision parameter  $\hat{\epsilon}_t$  is characterized by a distribution as described in main text section 3.6. The distributions of  $\hat{\epsilon}_t$  with  $\epsilon_{tc} = 0.5$  after 3 steps and 20 steps are relatively unchanged (Fig. S6a) in comparison to the distribution of  $\hat{\epsilon}_t$  with  $\epsilon_{tc} = 1$  (main text Fig. 4a) where the distribution broadens significantly more as a function of step number. The mean of the distribution for all values of  $\epsilon_{tc}$  converges by 5 steps (Fig. S6b), while the standard deviation for  $\epsilon_{tc}$  sufficiently below 1 converges by approximately 15 steps (Fig. S6c). When  $\epsilon_{tc} = 1$ , or if  $\epsilon_{tc}$  is sufficiently close to 1, the standard deviation of the distribution approaches steady state only after 80 steps.

## S6 Linear stability analysis: Jordan decomposition of $T_{ol}$ and $T_{an}$

The linear stability analysis for the open-loop runner proceeds analogously to the analysis for the anticipatory runner discussed in main text section 4. We define a Poincaré section transverse to

the runner's trajectory in phase space at the apex of the aerial phase ( $v_y = 0$ ), and a return map  $f_{\text{ol}}$  that maps the state of the runner  $\psi_n$  at the apex of the aerial phase at step  $n$ , to the state at the apex of the aerial phase on the following step  $\psi_{n+1}$  (main text Fig. 5). The state  $\psi$ , return map  $f_{\text{ol}}$ , and its linearization  $T_{\text{ol}}$  are defined by,

$$\psi = (x \ y \ \phi \ v_x \ \omega)^T \quad (\text{S10a})$$

$$\psi_{n+1} = f_{\text{ol}}(\psi_n), \quad (\text{S10b})$$

$$\Delta\psi_{n+1} = T_{\text{ol}}\Delta\psi_n, \text{ where } T_{\text{ol}} = \left. \frac{\partial f_{\text{ol}}}{\partial \psi} \right|_{\psi^*}, \quad (\text{S10c})$$

$$\text{and } \Delta\psi = \psi - \psi^*, \text{ where } \psi^* = f_{\text{ol}}(\psi^*). \quad (\text{S10d})$$

The linearized return maps,  $T_{\text{ol}}$  and  $T_{\text{an}}$  are non-diagonalizable as discussed in main text section 4. Thus an eigen-factorization of these matrices is not possible, so we perform a Jordan decomposition of  $T_{\text{ol}}$  and  $T_{\text{an}}$ . The Jordan decomposition of  $T_{\text{ol}}$  is,

$$T_{\text{ol}} = V_{\text{ol}} J_{\text{ol}} V_{\text{ol}}^{-1}, \quad (\text{S11a})$$

$$\text{where } J_{\text{ol}} = \begin{pmatrix} 1 & 0 & & & & \\ 0 & 1 & \frac{\sqrt{2}}{1+I/G} v_{y0} (I/G(\epsilon_n - 1) - \epsilon_n) & & 0 & 0 \\ 0 & 0 & 1 & & 0 & 0 \\ 0 & 0 & 0 & & \epsilon_n(2\epsilon_n - 1) & 0 \\ 0 & 0 & 0 & & 0 & 0 \end{pmatrix}, \quad (\text{S11b})$$

$$\text{and } V_{\text{ol}} = \begin{pmatrix} 0 & 1 & 0 & 0 & \frac{(1-I/G-4\epsilon_n)v_{y0}I/G}{1+I/G} \\ 0 & 0 & 0 & 1 & 0 \\ 1 & 0 & 0 & 0 & -v_{y0} \\ 0 & 0 & \frac{-1}{\sqrt{2}} & 0 & I/G \\ 0 & 0 & \frac{1}{\sqrt{2}} & 0 & 1 \end{pmatrix}. \quad (\text{S11c})$$

The linearized return map  $T_{\text{ol}}$  has rank 4, with two stable eigenvalues;  $\lambda = 0$  and  $\lambda = \epsilon_n(2\epsilon_n - 1)$ . The second stable eigenvalue corresponds to perturbations to the height of the apex of the aerial phase. The remaining eigenvalues are  $\lambda = 1$  which are associated with eigenvectors  $\nu_1$ ,  $\nu_2$ , and generalized eigenvector  $\nu_3$ , the same as the eigenvectors and generalized eigenvector associated with eigenvalues  $\lambda = 1$  for  $T_{\text{an}}$  (main text equation (7a)). Thus, a perturbation in the subspace spanned by these vectors  $\Delta\psi_0$  displays the same scaling with step number  $n$  as described in main text equation (8) for the anticipatory runner. These relationships for the open-loop runner are summarized as follows,

$$\Delta\psi_0 = \sum_{k=1}^3 \alpha_k \nu_k, \quad \Delta\psi_n = n\alpha_3(a_1\nu_1 + a_2\nu_2) + \Delta\psi_0, \quad (\text{S12a})$$

$$\Delta\psi_n \approx n \alpha_3 \begin{pmatrix} \frac{\sqrt{2}}{1+I/G} v_{y0} (I/G(\epsilon_n - 1) - \epsilon_n) \\ 0 \\ \sqrt{2}\epsilon_n v_{y0} \\ 0 \\ 0 \end{pmatrix}, \text{ for } n \gg 1, \quad (\text{S12b})$$

$$\text{substituting } a_1 = \sqrt{2}\epsilon_n v_{y0}, \text{ and } a_2 = \frac{\sqrt{2}}{1+I/G} v_{y0} (I/G(\epsilon_n - 1) - \epsilon_n), \quad (\text{S12c})$$

which are the off-diagonal terms of  $\mathbf{J}_{\text{ol}}$  (equation S11b). While the growth of the instability shows the same dependence on step number  $n$  as the anticipatory runner (main text equation (8)), the value of  $a_2$  differs, i.e. the projection onto  $\boldsymbol{\nu}_2$  of a perturbation along  $\boldsymbol{\nu}_3$  upon action of the return map  $\mathbf{T}_{\text{ol}}$ .

The stability of the anticipatory runner is discussed in detail in main text section 4. The Jordan decomposition of  $\mathbf{T}_{\text{an}}$  when  $\epsilon_{\text{tc}} < 1$  is,

$$\mathbf{T}_{\text{an}} = \mathbf{V}_{\text{an}} \mathbf{J}_{\text{an}} \mathbf{V}_{\text{an}}^{-1}, \quad (\text{S13a})$$

$$\text{where } \mathbf{J}_{\text{an}} = \begin{pmatrix} 1 & 0 & \sqrt{2}\epsilon_n v_{y0} & 0 & 0 \\ 0 & 1 & -\sqrt{2}\epsilon_n v_{y0} & 0 & 0 \\ 0 & 0 & 1 & 0 & 0 \\ 0 & 0 & 0 & \epsilon_n(2\epsilon_n - 1) & 0 \\ 0 & 0 & 0 & 0 & \epsilon_t \end{pmatrix}, \quad (\text{S13b})$$

$$\text{and } \mathbf{V}_{\text{an}} = \begin{pmatrix} 0 & 1 & 0 & 0 & \frac{(1+\epsilon_t(2\epsilon_n-1))I_{/G}v_{y0}}{\epsilon_t-1} \\ 0 & 0 & 0 & 1 & 0 \\ 1 & 0 & 0 & 0 & \frac{(1+\epsilon_t(2\epsilon_n-1))v_{y0}}{\epsilon_t-1} \\ 0 & 0 & \frac{-1}{\sqrt{2}} & 0 & I_{/G} \\ 0 & 0 & \frac{1}{\sqrt{2}} & 0 & 1 \end{pmatrix}. \quad (\text{S13c})$$

The anticipatory runner has a full rank return map  $\mathbf{T}_{\text{an}}$ , and stable eigenvalues  $\lambda = \epsilon_n(2\epsilon_n - 1)$ , which is identical to the open-loop runner, and  $\lambda = \epsilon_t$  which differs from the open-loop runner. The off-diagonal elements of  $\mathbf{J}_{\text{an}}$  are  $a_1 = \sqrt{2}\epsilon_n v_{y0}$  and  $a_2 = -\sqrt{2}\epsilon_n v_{y0}$  (equation S13b), which correspond to the projection onto  $\boldsymbol{\nu}_1$  and  $\boldsymbol{\nu}_2$  respectively, of a perturbation along  $\boldsymbol{\nu}_3$  upon action of the return map  $\mathbf{T}_{\text{an}}$ .

When  $\epsilon_{\text{tc}} = \epsilon_t = 1$  for the anticipatory runner, the linearization of  $\mathbf{f}_{\text{an}}$  about  $\boldsymbol{\psi}^*$  (main text equations 6) yields a different form for  $\mathbf{T}_{\text{an}}$ . The Jordan decomposition of  $\mathbf{T}_{\text{an}}$  when  $\epsilon_{\text{tc}} = 1$  is,

$$\mathbf{T}_{\text{an}} = \mathbf{V}_{\text{an}} \mathbf{J}_{\text{an}} \mathbf{V}_{\text{an}}^{-1}, \quad (\text{S14a})$$

$$\text{where } \mathbf{J}_{\text{an}} = \begin{pmatrix} 1 & 2\epsilon_n v_{y0} & 0 & 0 & 0 \\ 0 & 1 & 0 & 0 & 0 \\ 0 & 0 & 1 & 2\epsilon_n v_{y0} & 0 \\ 0 & 0 & 0 & 1 & 0 \\ 0 & 0 & 0 & 0 & \epsilon_n(2\epsilon_n - 1) \end{pmatrix}, \quad (\text{S14b})$$

$$\text{and } \mathbf{V}_{\text{an}} = \begin{pmatrix} 0 & 0 & 1 & 0 & 0 \\ 0 & 0 & 0 & 0 & 1 \\ 1 & 0 & 0 & 0 & 0 \\ 0 & 0 & 0 & 1 & 0 \\ 0 & 1 & 0 & 0 & 0 \end{pmatrix}. \quad (\text{S14c})$$

There is a single stable eigenvalue of  $\lambda = \epsilon_n(2\epsilon_n - 1)$  which is identical to that of the open-loop runner and the anticipatory runner with  $\epsilon_{\text{tc}} < 1$ . The remaining 4 eigenvalues are  $\lambda = 1$  which are associated with eigenvectors  $\boldsymbol{\nu}_1$ ,  $\boldsymbol{\nu}_2$  and generalized eigenvectors  $\boldsymbol{\nu}_3$  and  $\boldsymbol{\nu}_4$  (main text equations (9a)). Perturbations along  $\boldsymbol{\nu}_3$  project onto  $\boldsymbol{\nu}_1$ , and perturbations along  $\boldsymbol{\nu}_4$  project onto  $\boldsymbol{\nu}_2$ , upon action of the return map  $\mathbf{T}_{\text{an}}$  (equation (S14b)). The off-diagonal elements of  $\mathbf{J}_{\text{an}}$  are  $a_1 = a_2 = 2\epsilon_n v_{y0}$ .

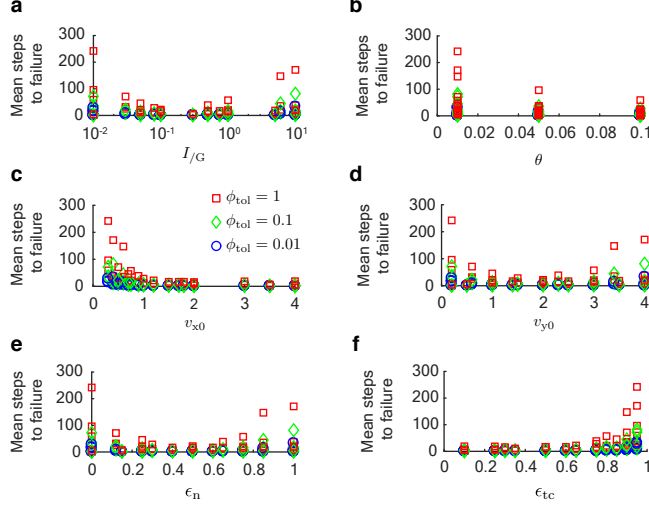

Figure S7: Mean steps to failure for the anticipatory runner ( $\epsilon_{tc} < 1$ ) plotted against all other parameters:  $I/G$ ,  $\theta$ ,  $v_{y0}$ ,  $\epsilon_n$ ,  $v_{x0}$ ,  $\epsilon_{tc}$ . Here,  $\theta$  refers to the typical slope angle the runner would encounter, defined as  $\theta = h/\lambda$ , where  $\lambda$  is the grid spacing of the terrain and  $[-h, h]$  is the range of heights of the terrain (section S1.3).

## S7 Scaling analysis of orientational failures

In main text section 5, we show that the orientation failure bound  $\phi_{tol}$  and the orientation change over a single step  $\phi_{\bullet}$  from encountering an unexpected terrain slope predict the mean steps to failure  $N$ , as  $N \sim \phi_{tol}/\phi_{\bullet}$ . The many parameters that define the runner and its gait do not separately predict mean steps to failure as accurately as the parameter  $\phi_{tol}/\phi_{\bullet}$  (Fig. S7).

The change in orientation over one step can be calculated using the vertical velocity  $v_{y,\bullet}^+$  and angular velocity  $\omega_{\bullet}^+$  at take-off as  $\phi_{\bullet} = 2v_{y,\bullet}^+ \omega_{\bullet}^+$  ( $\bullet = \text{'ol'}$  for open-loop and ‘an’ for anticipatory). For a runner landing on a terrain patch angled at  $\theta$  with respect to the horizontal, with center of mass velocity  $\mathbf{v}_G^- = (v_{x0} \ -v_{y0})^T$  and angular velocity  $\omega^- = 0$ , the take-off velocities  $v_{y,\bullet}^+$ ,  $\omega_{\bullet}^+$ , and

orientation change  $\phi_{\bullet}$ , are given by

$$\omega_{\text{an}}^+ = \frac{(1 - \epsilon_{\text{tc}})(v_{x0}(1 - \cos \theta) + v_{y0} \sin \theta)}{1 + I_{/G}}, \quad (\text{S15a})$$

$$\omega_{\text{ol}}^+ = \frac{v_{x0}(1 - \cos \theta) + v_{y0} \sin \theta}{1 + I_{/G}}, \quad (\text{S15b})$$

$$v_{y,\text{an}}^+ = v_{y0} + \frac{(1 + \epsilon_{\text{n}} + I_{/G}\epsilon_{\text{n}})(v_{x0} \sin 2\theta - v_{y0}(1 - \cos 2\theta))}{2(1 + I_{/G})}, \quad (\text{S15c})$$

$$v_{y,\text{ol}}^+ = v_{y,\text{an}} + \frac{2\epsilon_{\text{tc}}v_{x0} \sin \theta}{2(1 + I_{/G})}, \quad (\text{S15d})$$

$$\begin{aligned} \phi_{\text{an}} &= \frac{1 - \epsilon_{\text{tc}}}{(1 + I_{/G})^2} A(B + (\epsilon_{\text{tc}} - 1)C + (D + I_{/G}\epsilon_{\text{tc}})E + F - I_{/G}\epsilon_{\text{tc}}v_{y0}), \\ \phi_{\text{ol}} &= \frac{1}{(1 + I_{/G})^2} A(B + (2\epsilon_{\text{tc}} - 1)C + DE + F), \end{aligned} \quad (\text{S15e})$$

where  $A = v_{y0} \sin \theta + v_{x0}(1 - \cos \theta)$ ,  $B = 2(1 + I_{/G})(1 - \epsilon_{\text{n}})v_{y0} \cos \theta$ ,

$C = 2I_{/G}v_{x0} \sin \theta$ ,  $D = 1 + \epsilon_{\text{n}} + I_{/G}\epsilon_{\text{n}}$ ,

$E = v_{y0} \cos 2\theta + v_{x0} \sin 2\theta$ ,  $F = (I_{/G}\epsilon_{\text{n}} + \epsilon_{\text{n}} - 1)v_{y0}$ .

The parametric dependence of  $\phi_{\text{tol}}/\phi_{\bullet}$  ( $\phi_{\bullet}$  defined in equation (S15e)) on  $\epsilon_{\text{tc}}$  and  $\epsilon_{\text{n}}$  is captured by a power series approximation of  $\phi_{\bullet}$  to second order in  $\theta$  (main text equations (11a)-(11b)). The contour plots of  $\phi_{\text{tol}}/\phi_{\bullet}$  shown here using the truncated power series form of  $\phi_{\bullet}$  (Fig. S8) display the same qualitative trends as the ones in main text Fig. 7 which use the complete expression for  $\phi_{\bullet}$  (equation (S15e)). Therefore, we analyze failure statistics and runner morphology in main text section 5 and section 6 using the truncated power series approximation for  $\phi_{\bullet}$ .

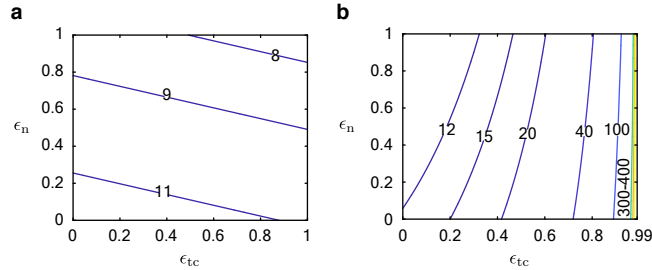

Figure S8: Contour plots of **a**,  $\phi_{\text{tol}}/\phi_{\text{ol}}$  and **b**,  $\phi_{\text{tol}}/\phi_{\text{an}}$  as a function of  $\epsilon_{\text{n}}$  and  $\epsilon_{\text{tc}}$ , where the form of  $\phi_{\bullet}$  shown in the power series expansion to second order in  $\theta$  has been used (main text equations (11a)-(11b)). The values of the contours differ slightly between the plots shown here and in the main text Fig. 7 but the qualitative trends are the same. The same parameter values are used in both these calculation,  $v_{y0} = 0.2$ ,  $I_{/G} = 0.15$ ,  $v_{x0} = 1$ ,  $\theta = 0.3$ ,  $\phi_{\text{tol}} = 1$ . For the anticipatory runner, maximum  $\epsilon_{\text{tc}} = 0.99$  to ensure that the calculation is limited to the region where runners primarily undergo orientational failures (Fig. S5a).

## S8 Steps to failure statistics

All the numerically estimated distributions of the steps to failure show similar qualitative features. They are unimodal with a long tail, and are relatively insensitive to changes in the terrain height

distribution (Fig. S1, main text Fig. 2e). The similarity of the distributions suggests that the stochastic dynamics underlying these distributions may be characterized by a small number of parameters.

The linear stability analysis shows that there are no changes to the linear or angular velocities as a result of perturbations from the ground. Focusing on the orientational instability, this implies that the rate of change of the angular velocity from step-to-step is zero. However, the terrain introduces perturbations at every step. When the correlation length of the random terrain is much smaller than a step length, like in the Monte Carlo simulations, the step-to-step perturbations may be treated as uncorrelated random perturbations. Irrespective of the distribution from which the random terrain is constructed, we make a heuristic appeal to the central limit theorem and posit that the net effect of the terrain perturbations is simply a Gaussian random forcing. Thus the stochastic step-to-step model for the orientation is that the discrete second derivative of the angle  $\phi$  is forced by a Gaussian random variable:

$$\phi(n+2) - 2\phi(n+1) + \phi(n) = w, \quad (\text{S16a})$$

$$\text{where } w \sim \mathcal{N}(0, \sigma^2), \quad (\text{S16b})$$

The random forcing  $w$  is drawn from a Gaussian with mean  $\langle w \rangle = 0$  and variance  $\langle w^2 \rangle = \sigma^2$ . In the absence of noise, the solution to the second-order difference equation yields  $\phi(n) = n(\phi(1) - \phi(0)) + \phi(0)$ . Thus the orientation of the runner  $\phi$  grows linearly with step number  $n$  in response to an initial perturbation  $(\phi(1) - \phi(0))$  as found in main text section 4.

With initial conditions  $\phi(1) = \phi(0) = 0$ , the probability distribution of  $\phi$  after  $n$  steps is given by

$$p(\phi, n) = \frac{e^{-\frac{\phi^2}{2\sigma^2 f(n)}}}{\sqrt{2\pi\sigma^2 f(n)}}, \quad (\text{S17a})$$

$$\text{where } f(n) = \frac{n(n+1)(2n+1)}{6}. \quad (\text{S17b})$$

$$\text{When } n \gg 1, f(n) \sim \frac{n^3}{3}. \quad (\text{S17c})$$

The probability distribution  $p(\phi, n)$  is Gaussian with mean  $\langle \phi \rangle = 0$  and variance that grows as  $n^3$  for large  $n$ .

Orientation failures occur when a runner's orientation exceeds  $\phi_{\text{tol}}$ . Thus, the probability of having failed by  $n$  steps, which we denote with  $p_{\text{fall}}(n)$ , is given by

$$p_{\text{fall}}(n) = p(|\phi| > \phi_{\text{tol}}, n), \quad (\text{S18a})$$

$$\Rightarrow p_{\text{fall}}(n) = 1 - \text{erf}\left(\frac{\phi_{\text{tol}}}{\sqrt{2\sigma^2 f(n)}}\right), \quad (\text{S18b})$$

$$\text{where } \text{erf}(x) = \frac{1}{\sqrt{\pi}} \int_{-x}^x e^{-u^2} du, \quad (\text{S18c})$$

is the error function. The probability of failing at step number  $n$ , denoted by  $p_{\text{steps}}(n)$ , is given by the probability of taking  $n-1$  steps without failing, and then failing at step number  $n$ , i.e.  $p_{\text{steps}}(n) = p(|\phi| > \phi_{\text{tol}}, n \mid |\phi| < \phi_{\text{tol}}, n-1)$ . This is equivalent to the probability flux at  $\phi_{\text{tol}}$  at step

$n$ , given by

$$p_{\text{steps}}(n) = p_{\text{fall}}(n) - p_{\text{fall}}(n-1), \quad (\text{S19a})$$

$$\Rightarrow p_{\text{steps}}(n) = \text{erf}\left(\frac{\phi_{\text{tol}}}{\sqrt{2\sigma^2 f(n-1)}}\right) - \text{erf}\left(\frac{\phi_{\text{tol}}}{\sqrt{2\sigma^2 f(n)}}\right). \quad (\text{S19b})$$

The mean steps to failure  $N$  are thus given by

$$N = \sum_{n=0}^{\infty} n p_{\text{steps}}(n), \quad (\text{S20a})$$

$$\Rightarrow N = \sqrt{\frac{6}{\pi}} \sum_{i=1}^{\infty} -1^{i+1} \left(\frac{3}{2}\right)^i \zeta\left(\frac{3(2i-1)}{2}\right) \frac{(\phi_{\text{tol}}/\sigma)^{2i-1}}{(i-1)!}, \quad (\text{S20b})$$

We use the approximation  $f(n) = n^3/3$  and  $\zeta(p)$  is the Riemann-zeta function defined by  $\zeta(p) = \sum_{i=1}^{\infty} 1/i^p$  for  $p > 1$ . The mean steps to failure depend on a single parameter,  $\phi_{\text{tol}}/\sigma$ , the ratio of the tolerance-angle  $\phi_{\text{tol}}$  to the intensity of the external noisy forcing  $w$ .

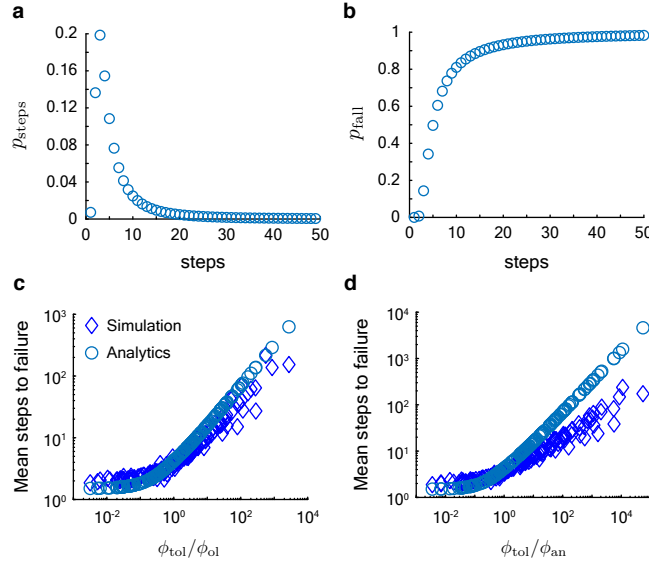

Figure S9: Steps to failure statistics of the single parameter stochastic model. **a**,  $p_{\text{steps}}$  from equation (S19) and **b**,  $p_{\text{fall}}$  from equation (S18) plotted against steps taken  $n$  with human-like parameter values for  $\phi_{\text{tol}}$  and  $\sigma = \phi_{\text{ol}}$  (main text table 1). The mean of this distribution 9.6, is similar to the numerically computed mean steps to failure for the open-loop runner with human-like parameters which is  $9.61 \pm 0.01$  (Fig. S1c). However, for a wider range of  $\phi_{\text{tol}}/\phi_{\bullet}$  values, the mean of the analytical model (open circles) for **c**, open-loop runners and **d**, anticipatory runners deviates from mean steps to failure from the Monte Carlo simulations (open diamonds, main text Fig. 6). The parameters values used for  $\phi_{\text{tol}}$  and  $\phi_{\bullet}$  are shown in Fig. S7.

The probability of failing at step  $n$ ,  $p_{\text{steps}}(n)$  (Fig. S9a), and its cumulative distribution  $p_{\text{fall}}(n)$  (Fig. S9b) are qualitatively similar to the numerically computed steps to failure distributions shown in Fig. S1 and main text Fig. 2e, and the cumulative distributions shown in main text Fig. 2a,b, in that they are unimodal with long tails.

We compare the mean of the numerically computed steps to failure distributions and the analytically derived mean from the stochastic model (Fig. S9c,d). The standard deviation of the noise

from the terrain is equated to the orientation change in a single step due to the terrain according to  $\sigma = \phi_\bullet$  (main text section 5). since  $\phi_\bullet$  sets the scale for orientation change over a single step due to an unexpected terrain slope (main text section 5). The mean steps to failure in both the Monte Carlo simulations and the analytical Markov chain model show power laws as a function of  $\phi_{\text{tol}}/\phi_\bullet$ , but with different exponents (Fig. S9c,d).

## S9 Effect of changing runner size relative to terrain grid spacing

The size of the runner  $r_\ell$  relative to the grid spacing of the terrain  $\lambda$  determines the range of terrain slopes accessed by the runner (main text section 6, Fig. S10). For example, if  $\lambda/r_\ell = 1$ , the range of terrain slopes encountered by the runner is nearly the same as the slope distribution of the terrain itself (Fig. S10a). By decreasing this ratio to  $\lambda/r_\ell = 0.01$  while keeping the terrain slope distribution constant, we find that the range of slopes encountered by the runner is significantly lower (Fig. S10b). We quantify this trend using the parameter  $\sigma_{\text{runner}}/\sigma_{\text{terrain}}$  where  $\sigma_{\text{runner}}$  is the standard deviation of the slope distribution encountered by the runner, and  $\sigma_{\text{terrain}}$  is the standard deviation of the terrain slope distribution. The parameter  $\sigma_{\text{runner}}/\sigma_{\text{terrain}}$  approaches 1 as  $\lambda/r_\ell$  increases (Fig. S10c).

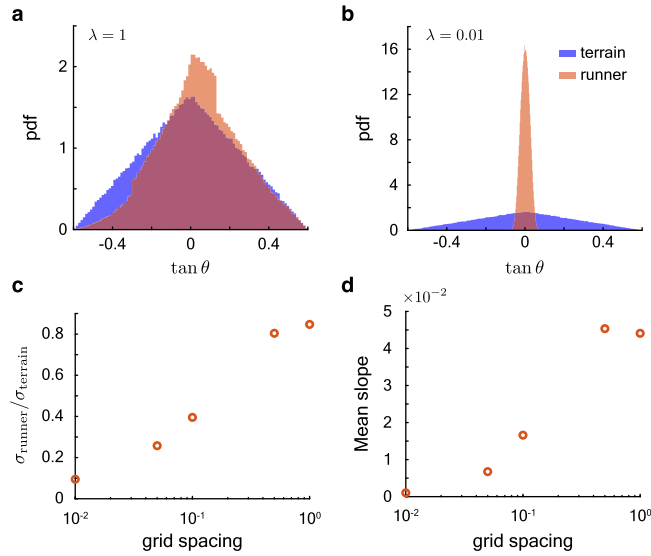

Figure S10: Effect of varying the ratio of leg length  $r_\ell$  to terrain grid spacing  $\lambda$ . The probability density function of the terrain slope ( $\tan \theta$ ) encountered by the open-loop runner (orange) with human-like parameters is plotted for grid spacing **a**,  $\lambda = r_\ell$  and **b**,  $\lambda = 0.01r_\ell$ . The height distribution of the terrain grid points was adjusted so that the terrain's slope distribution (blue) was the same in all simulations. The number of steps used to generate these probability density functions was  $\sim 10^6$ . **c**, Shows the standard deviation of the slope encountered by the runner relative to the standard deviation of the terrain's slope distribution. **d**, The mean slope encountered by the runner as a function of grid spacing  $\lambda$ .

The mean slope encountered by the runner is always greater than zero (Fig. S10d) even though the slope distribution of the terrain has a zero mean. As the range of slopes encountered by the runner increases, the mean slope encountered by the runner deviates further from zero (Fig. S10d). This is consistent with the observation from the Monte Carlo simulations that runners slow down



on rough terrain since the effect of the mean slope encountered is to redirect forward momentum into vertical momentum.

## S10 Monte Carlo simulations with a *lab-fixed* push-off policy

The change in angular velocity due to the push-off impulse  $\mathbf{J}_{\text{imp}}$  applied under the *lab-fixed* push-off policy destabilizes the runner as it exacerbates angular momentum fluctuations that arise due to variations in terrain slope angle  $\theta$ . When  $\theta > 0$ , the runner collides with lower tangential velocity compared to flat ground, resulting in a smaller clockwise pitching moment than if the runner were colliding with a flat terrain patch. Yet the clockwise pitching moment induced by the push-off impulse  $\mathbf{J}_{\text{imp}}$  is larger than what it would be on flat ground (equation S8d), causing the runner to spin excessively in the clockwise direction. Conversely, when  $\theta < 0$ , the runner lands at a shallower angle, increasing the tangential collision impulse and inducing a larger clockwise angular impulse on the runner compared to what it would experience when  $\theta = 0$ . However, the push-off impulse induces a smaller counter-clockwise change in angular velocity at push-off  $\omega_{\text{imp}}$  relative to flat ground (equation S8d), causing the runner to spin in the anti-clockwise direction. In contrast, the angular velocity change due to the push-off impulse under the *terrain-fixed* push-off policy is independent of the terrain slope  $\theta$  (equation S8d). As we have seen in the main text this push-off cannot stabilize the runner. However, it does not amplify angular momentum fluctuations caused by slope variations like in the *lab-fixed* push-off policy. Thus the *lab-fixed* push-off policy leads to quicker orientational failures compared to the *terrain-fixed* push-off policy.

### S10.1 Open-loop runners

Open-loop runners with a *lab-fixed* push-off and human-like parameters only fail due to losing orientational stability (Fig. S11a). Increasing energy dissipation in the direction normal to the terrain surface reduces mean steps taken by these open-loop runners. This trend contrasts that observed with the *terrain-fixed* push-off where increasing normal energy dissipation increased the steps taken (main text Fig. 2d). The increase in mean steps taken with the *lab-fixed* push-off is at most 1 for a 100% reduction in energy dissipation, from  $\epsilon_n = 0$  to  $\epsilon_n = 1$  at a fixed value of  $\epsilon_{tc}$  (Fig. S11b).

Reducing  $\epsilon_{tc}$  increases steps taken (Fig. S11b), unlike the trend observed with the *terrain-fixed* push-off policy where changing  $\epsilon_{tc}$  had negligible effect on the mean steps to failure (main text Fig. 2d). Open-loop runners increase mean steps taken by 2 when  $\epsilon_{tc}$  is reduced from 1 to 0 while holding  $\epsilon_n$  fixed at any value (Fig. S11b).

Open-loop runners with a *lab-fixed* push-off policy perform best when  $\epsilon_n = 1, \epsilon_{tc} = 0$  and worst when  $\epsilon_n = 0, \epsilon_{tc} = 1$ . The difference in mean steps taken at these extremes is just 3 steps. The maximum mean steps taken by the open-loop runner with a *lab-fixed* push-off is 9 steps (Fig. S11b), the same as the minimum number of steps taken by the open-loop runner with a *terrain-fixed* push-off policy (main text Fig. 2d). Thus, compared to the *terrain-fixed* push-off policy, open-loop runners with the *lab-fixed* push-off policy fare worse, and display differing trends in how stability is determined by the collision parameters,  $\epsilon_n$  and  $\epsilon_{tc}$ . However, similar to the *terrain-fixed* push-off policy, varying parameters governing the passive collision has a small effect on the mean steps to failure compared to similar changes in collision parameters in anticipatory runners.

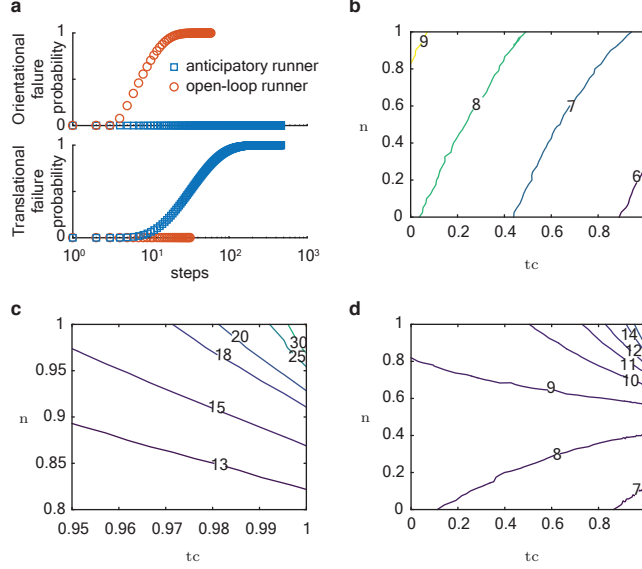

Figure S11: Runners with a *lab-fixed* push-off policy: effect of energy dissipation and tangential collisions. **a**, Open-loop runners with human-like parameters and  $\epsilon_{tc} = 0, \epsilon_n = 1$  undergo orientational failures on rough terrain, while human-like anticipatory runners with  $\epsilon_{tc} = 1, \epsilon_n = 1$  maintain orientation but lose forward momentum. **b**, Contour map of mean steps to failure for the human-like open-loop runner as a function of  $\epsilon_n$  and  $\epsilon_{tc}$ . **c**, Contour map of the mean steps to failure for the anticipatory runner as a function of  $\epsilon_n$  and  $\epsilon_{tc}$  zoomed into the region near the maximum steps taken where contour spacing is small. **d**, Away from the maximum, contour spacing increases for the anticipatory runner demonstrating reduced sensitivity to changes in  $\epsilon_n$  and  $\epsilon_{tc}$ . The  $\epsilon_{tc} = 0$  strategy is identical between the open-loop and anticipatory runners like with the *terrain-fixed* push-off policy.

## S10.2 Anticipatory runners

Anticipatory runners with a *lab-fixed* push-off policy increase mean steps taken as energy dissipation in the direction normal to the terrain surface is reduced. This is in contrast to the trend observed for anticipatory runners with the *terrain-fixed* push-off policy, where increasing normal energy dissipation increases mean steps to failure (main text Fig. 3a). Anticipatory runners fail by losing orientational stability except when  $\epsilon_{tc} = 1$  and  $\epsilon_n = 1$  (Fig. S11a), in contrast to the *terrain-fixed* push-off policy where anticipatory runners maintain orientation when  $\epsilon_{tc} = 1$ , and regardless of the value of  $\epsilon_n$  (main text Fig. 3a). At  $\epsilon_{tc} = 1$ , anticipatory runners with a *lab-fixed* push-off, increase mean steps taken by over 4-fold, from 7 to over 30 for a 100% reduction in normal energy dissipation from  $\epsilon_n = 0$  to  $\epsilon_n = 1$  (Fig. S11c).

Reducing the tangential collisional impulse at landing  $\epsilon_{tc}$  increases mean steps to failure for the anticipatory runner with a *lab-fixed* push-off if  $\epsilon_n$  is sufficiently high, while showing the opposite trend below that  $\epsilon_n$  value (Fig. S11d). This is in contrast to the trend observed in anticipatory runners with the *terrain-fixed* push-off policy where mean steps taken always increases when  $\epsilon_{tc}$  is reduced (main text Fig. 3a).

Anticipatory runners with a *lab-fixed* push-off policy perform best when  $\epsilon_{tc} = 1, \epsilon_n = 0$  and worst when  $\epsilon_{tc} = 1, \epsilon_n = 1$ . The *lab-fixed* push-off policy is consistently worse in terms of stability than the *terrain-fixed* push-off policy for a given pair of  $\epsilon_{tc}, \epsilon_n$  values. At  $\epsilon_{tc} = 1, \epsilon_n = 1$  both push-off policies are identical, as this corresponds to  $\mathbf{J}_{imp} = 0$  in both.

Running with slight non-zero tangential collisions is optimal in the presence of sensorimotor noise (Fig. S12a). Sensorimotor noise is modeled as additive noise to  $\epsilon_{tc}$  as described in main text section 3.5. This trend is similar to that found with the *terrain-fixed* push-off policy (main text Fig. 3b).

### S10.3 Scaling analysis of mean steps taken

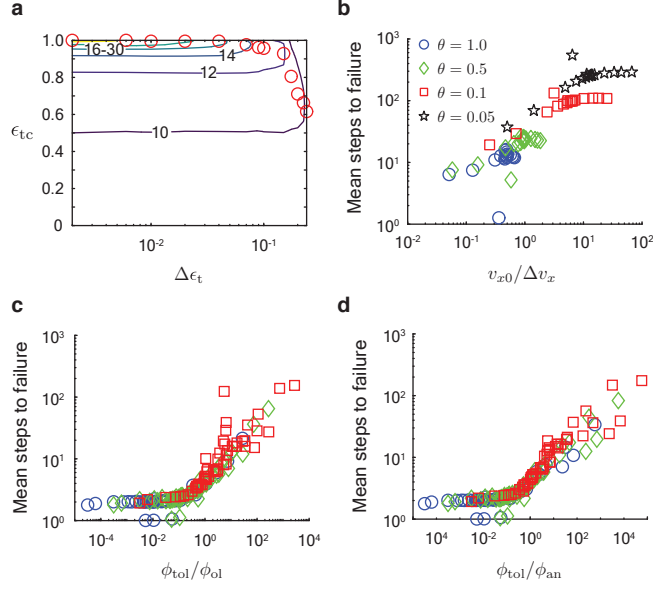

Figure S12: Effect of sensorimotor noise on stability, and scaling analysis of mean steps to failure. **a**, Contour map of mean steps taken as a function of  $\epsilon_{tc}$  and  $\Delta\epsilon_t$  shows that mean steps to failure reduces with increasing sensorimotor noise  $\Delta\epsilon_t$ . Scuffing the ground upon landing is optimal as noise intensity  $\Delta\epsilon_t$  is increased. Red circles denote the optimal  $\epsilon_{tc}$  value for a given  $\Delta\epsilon_t$ . In these simulations  $\epsilon_n = 1$ . **b**, For the anticipatory runner with  $\epsilon_{tc} = 1, \epsilon_n = 1$ , the mean steps to translational failure are predicted by the parameter  $v_{x0}/\Delta v_x$ . The values of the remaining parameters used in this simulation are shown in Fig. S7. Mean steps to orientation failure are captured by the parameter **c**,  $\phi_{tol}/\phi_{ol}$  for the open-loop runner, and by **d**,  $\phi_{tol}/\phi_{an}$ , for the anticipatory runner. The parameter values used for these simulations are also shown in Fig. S7.

The mean steps to failure  $N$  for the steps to orientational failure on rough terrains are predicted by the orientation change over a single step relative to the failure bound  $\phi_{tol}/\phi_{\bullet}$ ,  $N \sim \phi_{tol}/\phi_{\bullet}$  (Fig. S12c,d). The loss of forward speed relative to initial forward speed ( $v_{x0}/\Delta v_x$ ) predicts the mean steps to translational failure  $N \sim v_{x0}/\Delta v_x$  for anticipatory runners with  $\epsilon_{tc} = 1$  and  $\epsilon_n = 1$  (Fig. S12b). These trends are similar to those observed for the runner with a *terrain-fixed* push-off policy (main text Fig. 6), although there is a greater spread in the data about the trend line with the *lab-fixed* push-off.

## Supplementary references

Alexander, R., Ker, R., Bennet, M., Bibby, S. and Kester, R. (1987). The spring in the arch of the human foot. *Nature* **325**, 147–149.

- Cavagna, G. and Kaneko, M.** (1977). Mechanical work and efficiency in level walking and running. *The Journal of physiology* **268**, 467.
- Cavagna, G., Saibene, F. and Margaria, R.** (1964). Mechanical work in running. *Journal of applied physiology* **19**, 249–256.
- Dhawale, N., Mandre, S. and Venkadesan, M.** (2015). Running on rough terrains: Energetics and stability. *Dynamic Walking*.
- Dhawale, N. and Venkadesan, M.** (2018). Energetics and stability of running on rough terrains. American Society of Biomechanics.
- Erdmann, W. S.** (1999). Geometry and inertia of the human body-review of research. *Acta of Bioengineering and biomechanics* **1**, 23–35.
- Jenkins, M. and Traub, J. F.** (1970). A three-stage algorithm for real polynomials using quadratic iteration. *SIAM Journal on Numerical Analysis* **7**, 545–566.
